# Supplementary material for: Caspase-3 probes for PET imaging of apoptotic tumor response to anticancer therapy
Source: Royal Society of Chemistry journal article supplement (doi:10.1039/c9ob00657e), 2019-01-01

## Supplemental information for

# Caspase-3 probes for PET imaging of apoptotic tumor response to anticancer therapy

Filipe Elvas<sup>a,b,c†</sup>, Tom Vanden Berghe<sup>d,e,f</sup>, Yves Adriaenssens<sup>b</sup>, Peter Vandenabeele<sup>d,e,g</sup>, Koen Augustyns<sup>b</sup>,  
Steven Staelens<sup>a</sup>, Sigrid Stroobants<sup>a,c</sup>, Pieter Van der Veken<sup>b</sup>, Leonie wyffels<sup>a,c</sup>

Supplemental Figure 1

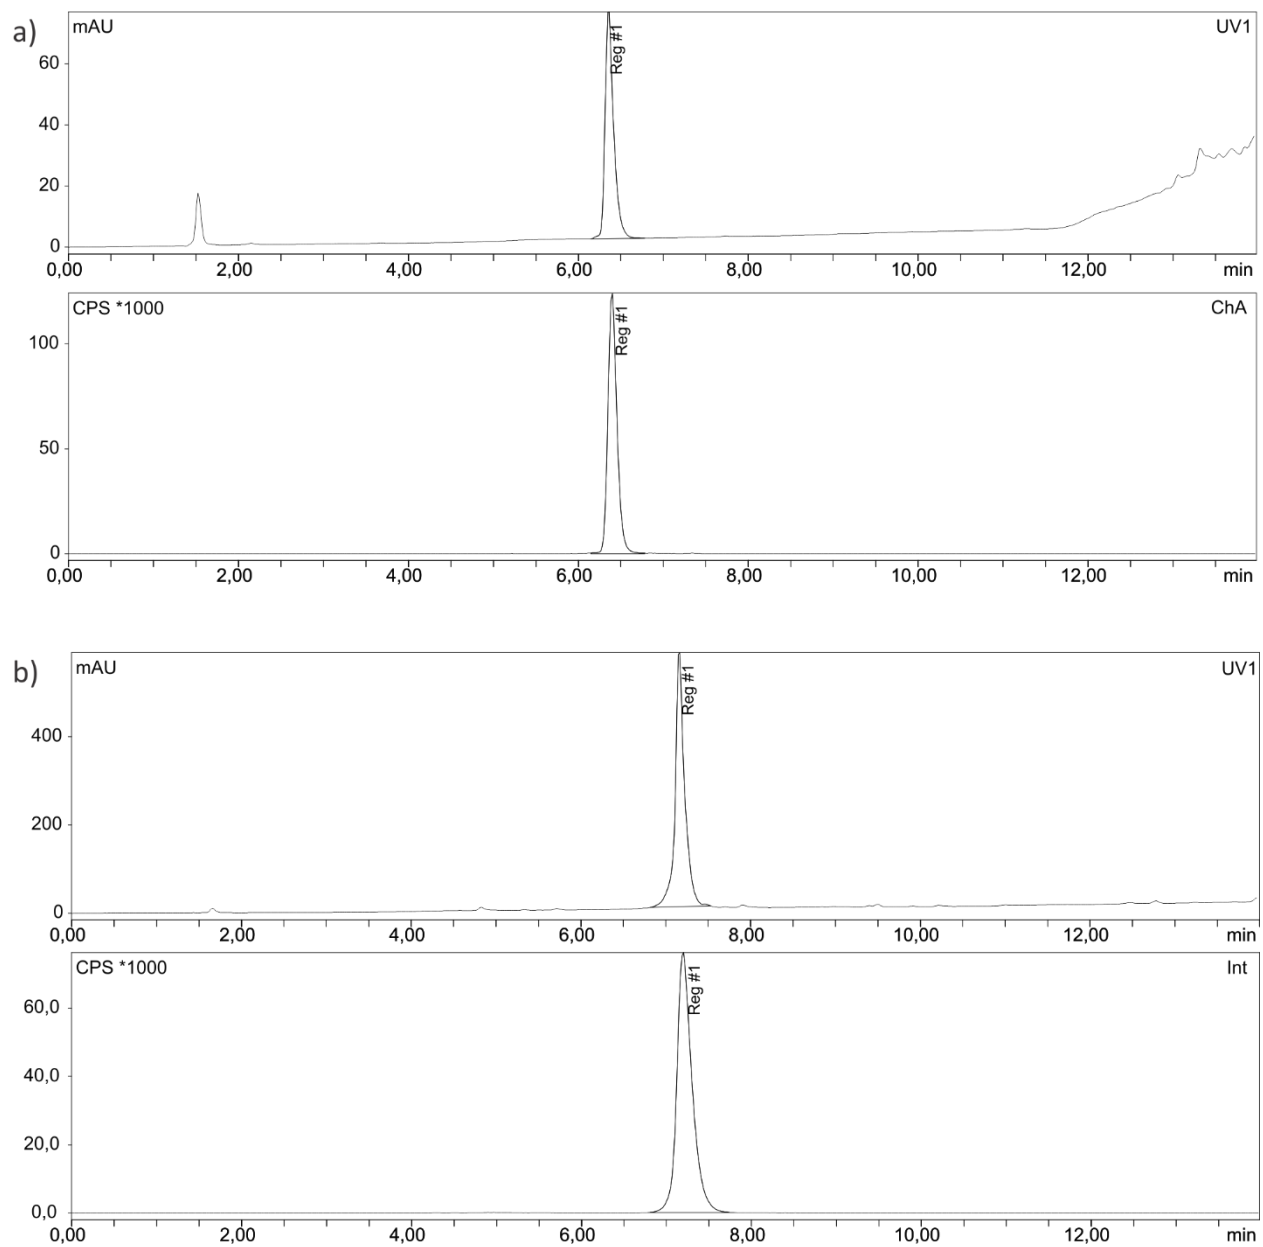

**Supplemental Figure 1.** UV-vis- (upper trace) and radio- (lower trace) HPLC chromatograms of [ $^{18}\text{F}$ ]MICA-301 (a), and [ $^{18}\text{F}$ ]MICA-302 (b) co-injected with the reference  $^{18}\text{F}$  standard **1f** and **1d**, respectively.

Supplemental Figure 2

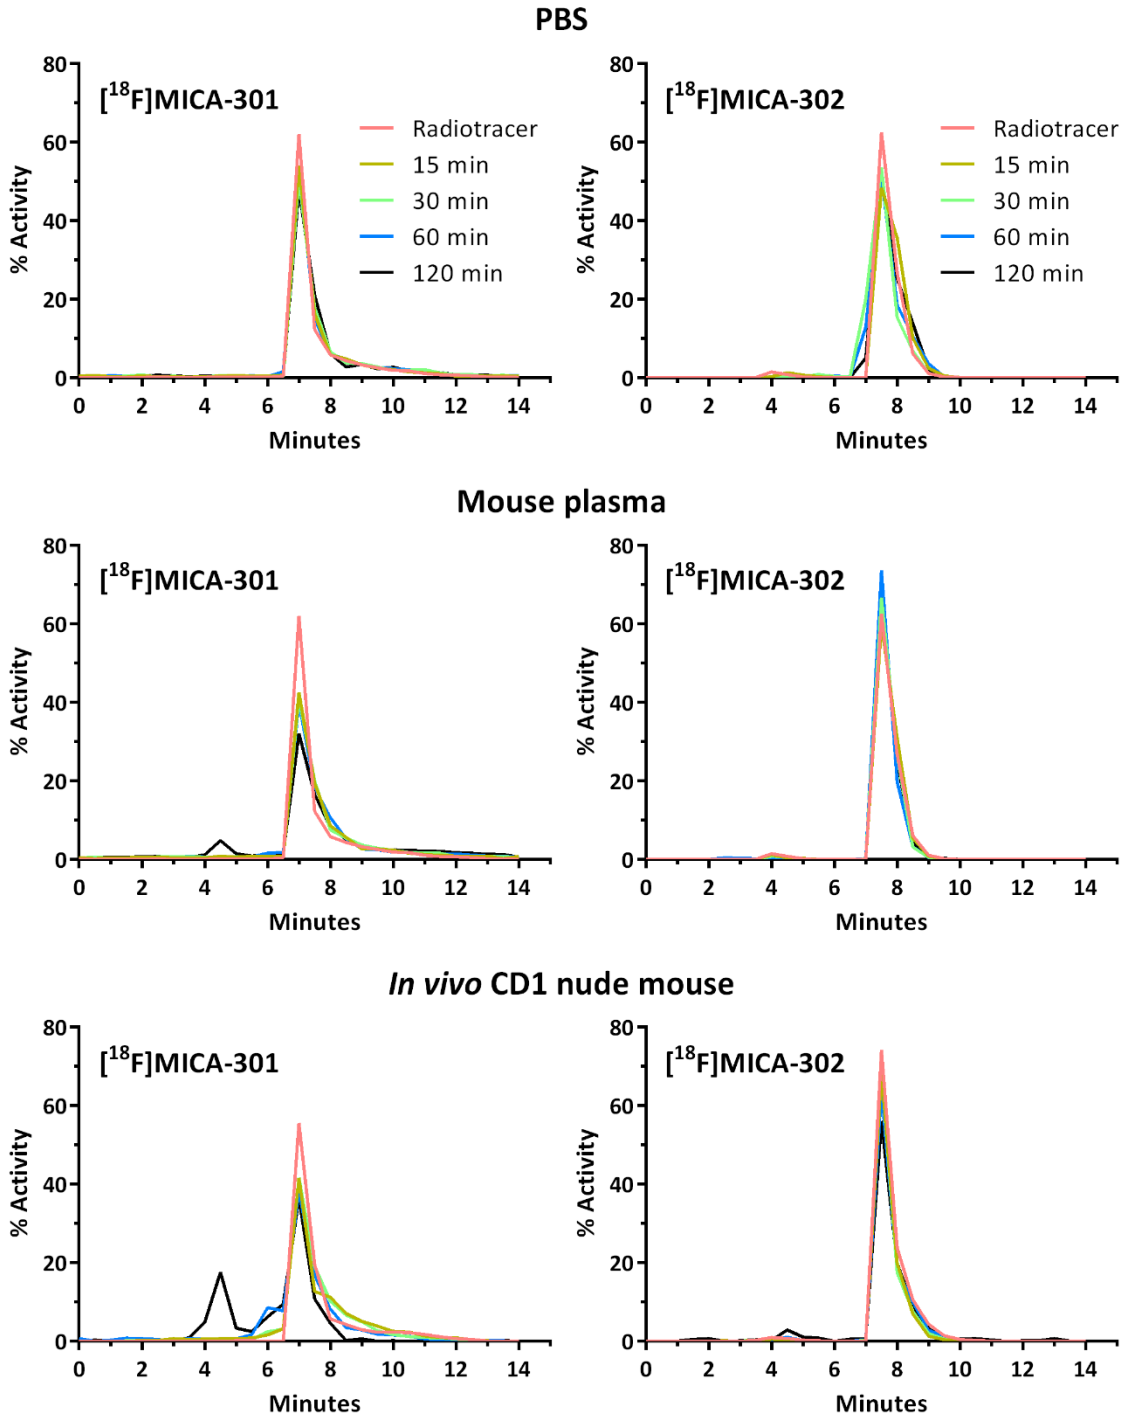

Supplemental Figure 2. *In vitro* and *in vivo* stability of [<sup>18</sup>F]MICA-301 (left) and [<sup>18</sup>F]MICA-302 (right).

Supplemental Figure 3

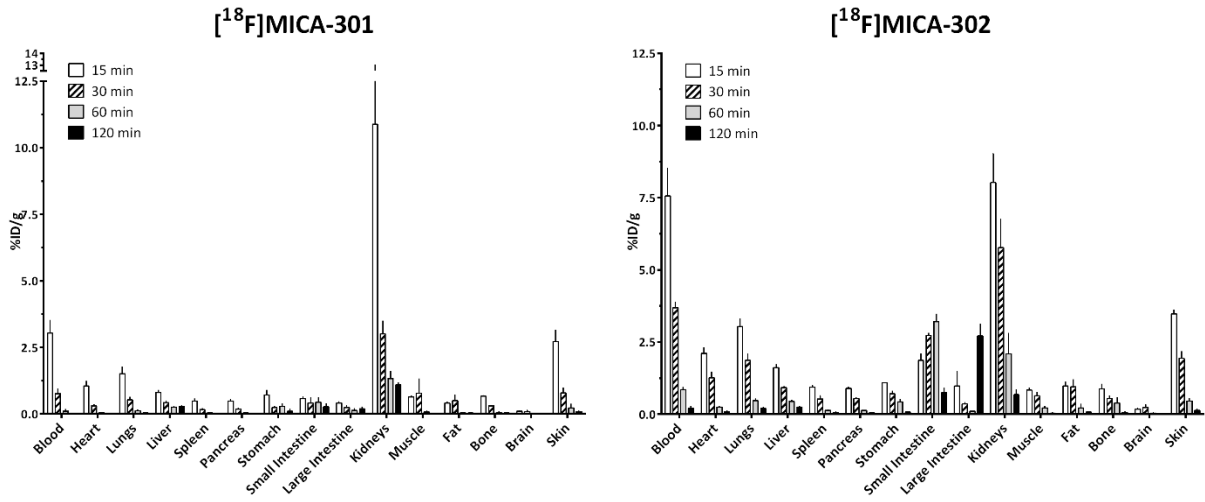

**Supplemental Figure 3.** *Ex vivo* tissue distribution (%ID/g ± SD) of [<sup>18</sup>F]MICA-301 (left) and [<sup>18</sup>F]MICA-302 (right) at different time points post injection in normal nude mice. Data are presented as mean ± SD.

Supplemental Figure 4

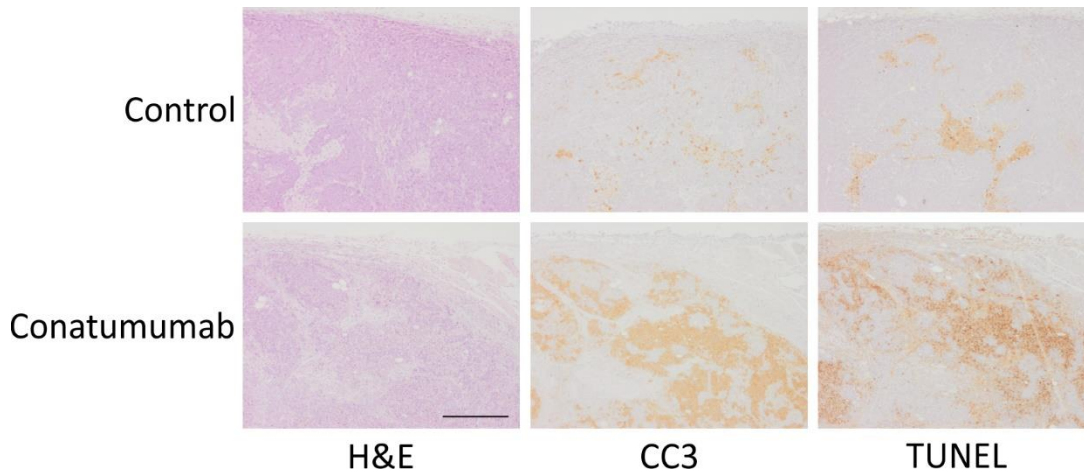

**Supplemental Figure 4.** Representative microscopic images of adjacent COLO205 tumor slices stained with H&E, CC3 and TUNEL acquired at x5 magnification. Cells in brown were positive for CC3 and TUNEL staining. Scale bar: 500µm.

**Supplementary Table 1** *Ex vivo* biodistribution data for selected tissues in IgG1 and conatumumab-treated mice 60 min p.i.

| Tissue          | <sup>[18F]</sup> MICA-301 |                 | <sup>[18F]</sup> MICA-302 |                |
|-----------------|---------------------------|-----------------|---------------------------|----------------|
|                 | IgG1                      | Conatumumab     | IgG1                      | Conatumumab    |
| Blood           | 0.53 ± 0.14               | 0.40 ± 0.32     | 0.99 ± 0.14               | 0.94 ± 0.04    |
| Heart           | 0.14 ± 0.03               | 0.12 ± 0.08     | 0.73 ± 0.13               | 0.74 ± 0.31    |
| Liver           | 0.54 ± 0.07               | 0.42 ± 0.07     | 1.26 ± 0.46               | 1.34 ± 0.61    |
| Spleen          | 0.19 ± 0.02               | 0.16 ± 0.08     | 0.55 ± 0.16               | 0.64 ± 0.15    |
| Stomach         | 0.17 ± 0.03               | 0.15 ± 0.08     | 1.05 ± 0.53               | 0.96 ± 0.46    |
| Small intestine | 0.27 ± 0.04               | 0.20 ± 0.07     | 5.54 ± 2.64               | 4.04 ± 0.95    |
| Large intestine | 0.19 ± 0.04               | 0.15 ± 0.07     | 0.51 ± 0.08               | 0.45 ± 0.18    |
| Kidneys         | 4.44 ± 0.85               | 2.70 ± 1.68     | 5.22 ± 1.37               | 8.23 ± 2.31    |
| Muscle          | 0.17 ± 0.02               | 0.23 ± 0.02     | 0.41 ± 0.19               | 0.37 ± 0.07    |
| Bone            | 0.22 ± 0.15               | 0.15 ± 0.08     | 0.56 ± 0.26               | 0.50 ± 0.10    |
| Brain           | 0.05 ± 0.01               | 0.05 ± 0.05     | 0.11 ± 0.02               | 0.14 ± 0.05    |
| Urine           | 734.42 ± 288.80           | 449.33 ± 320.88 | 334.79 ± 154.66           | 227.80 ± 24.02 |
| Tumor           | 0.21 ± 0.05               | 0.29 ± 0.03     | 0.79 ± 0.18               | 1.47 ± 0.26*   |

Data are mean ± SD

\*p=0.025, vs. IgG1-control group

Compound 1a (in CD<sub>3</sub>OD, standardized to 3.31 signal)

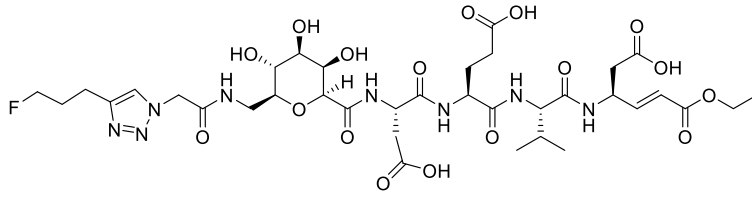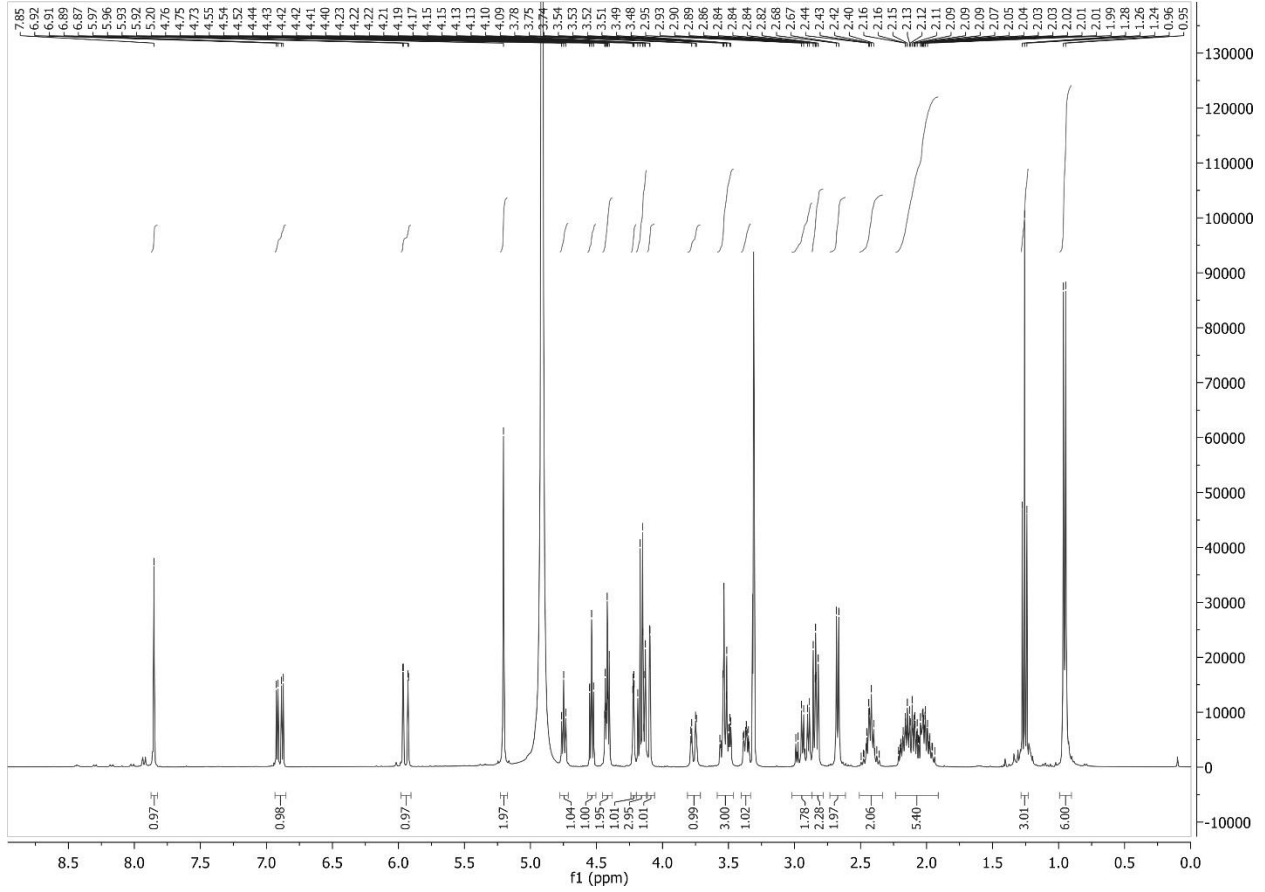

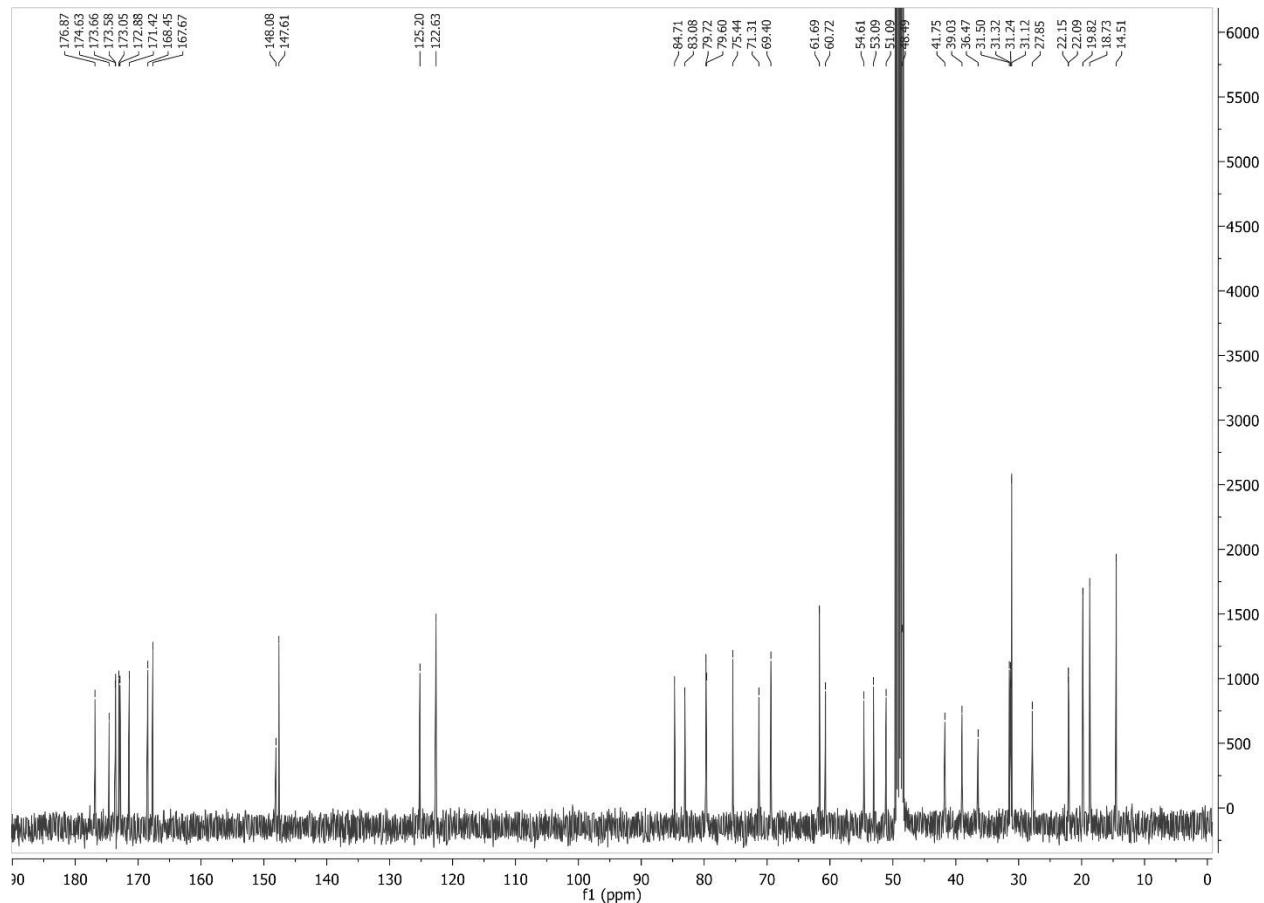

Compound 1b (in D<sub>2</sub>O, standardized to 4.79 signal)

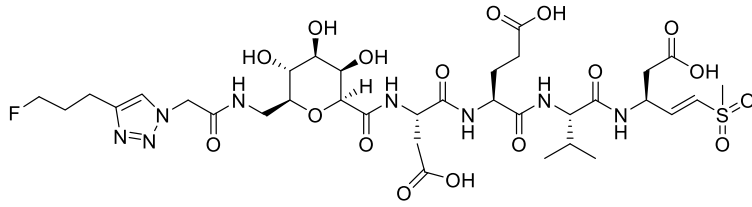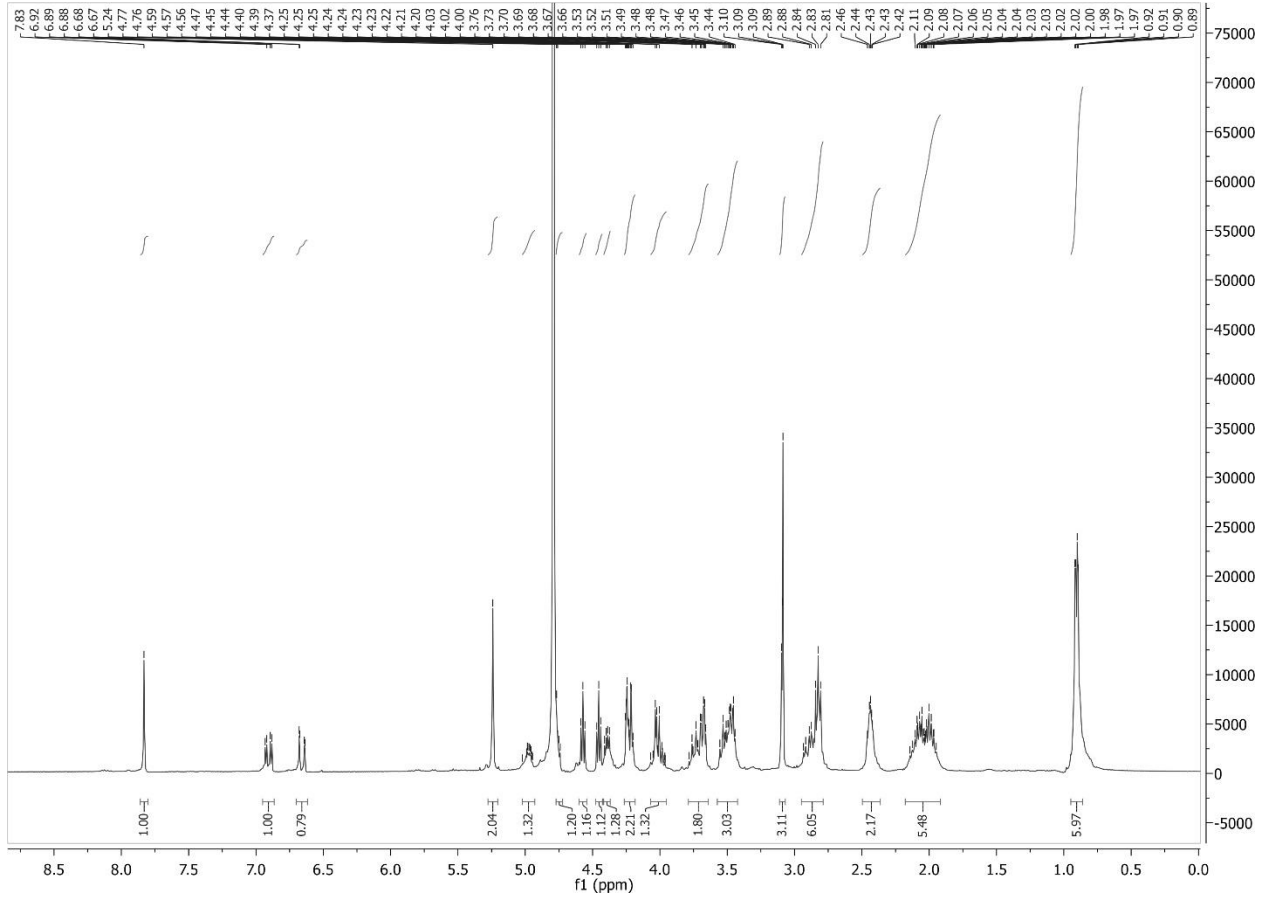



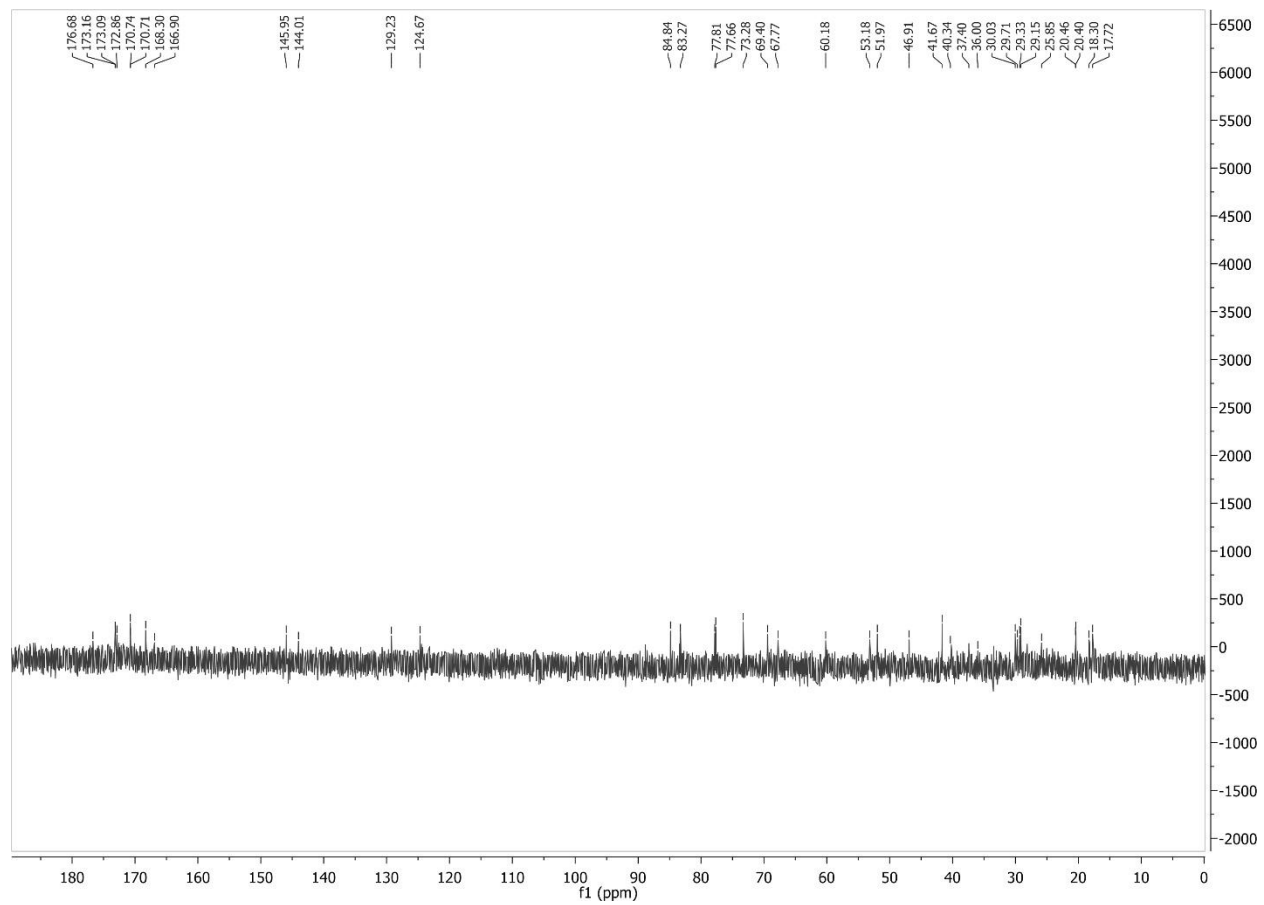



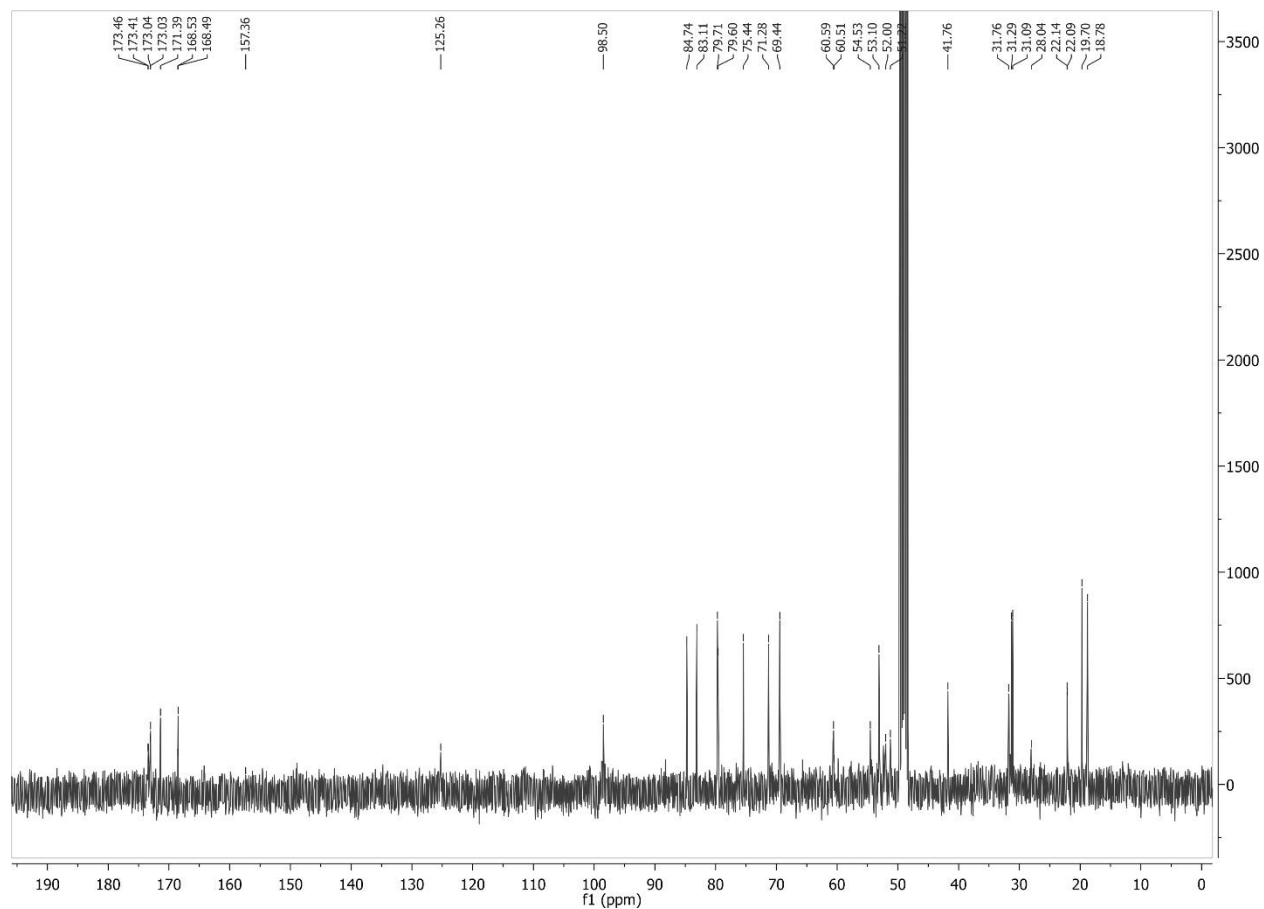



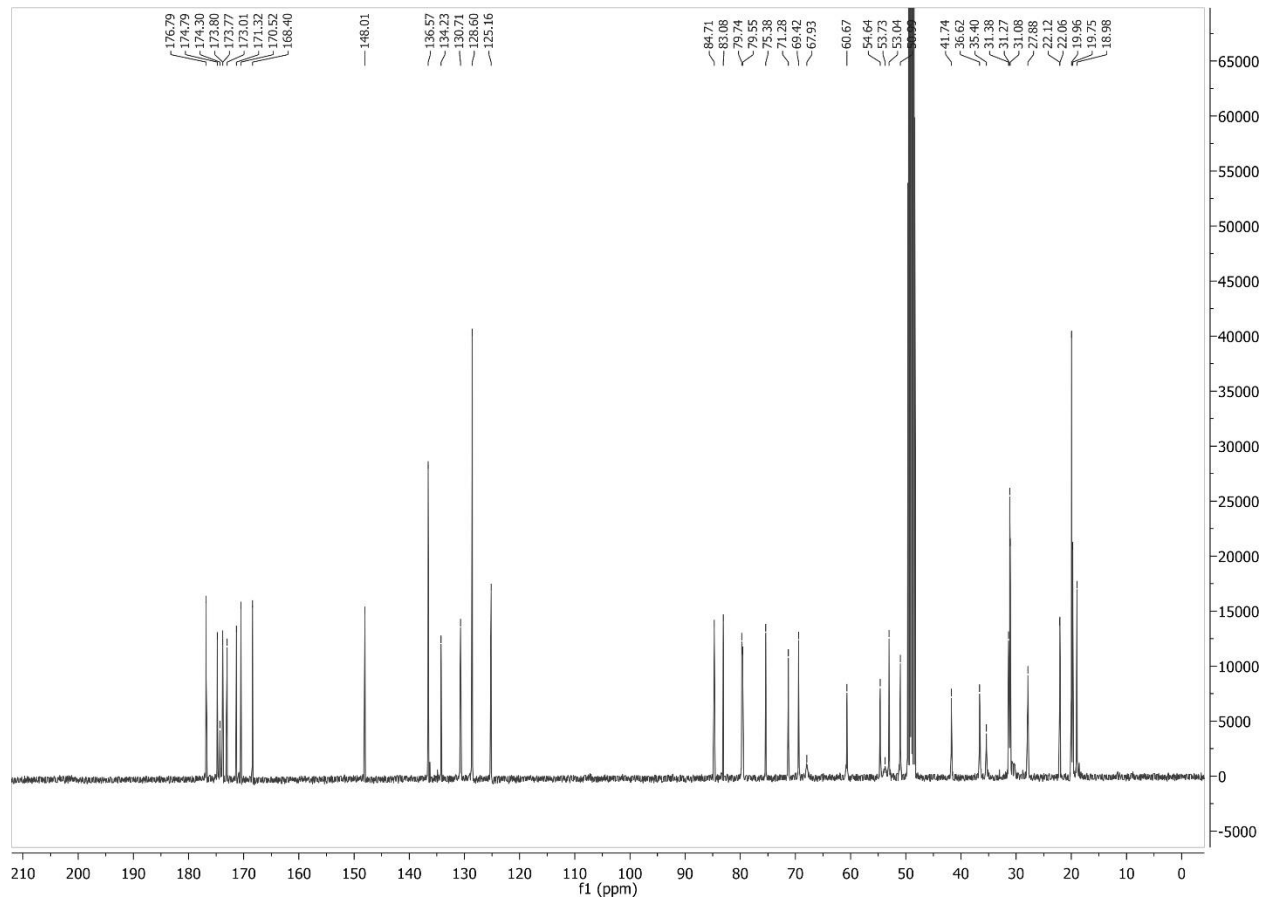

Compound 1e (in CD<sub>3</sub>OD, standardized to 3.31 signal)

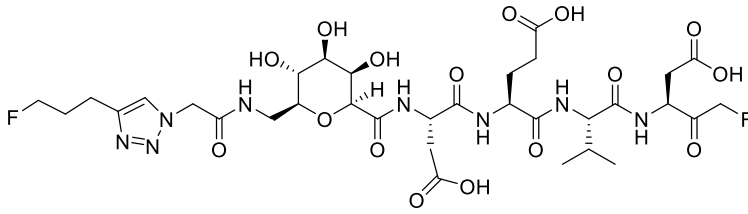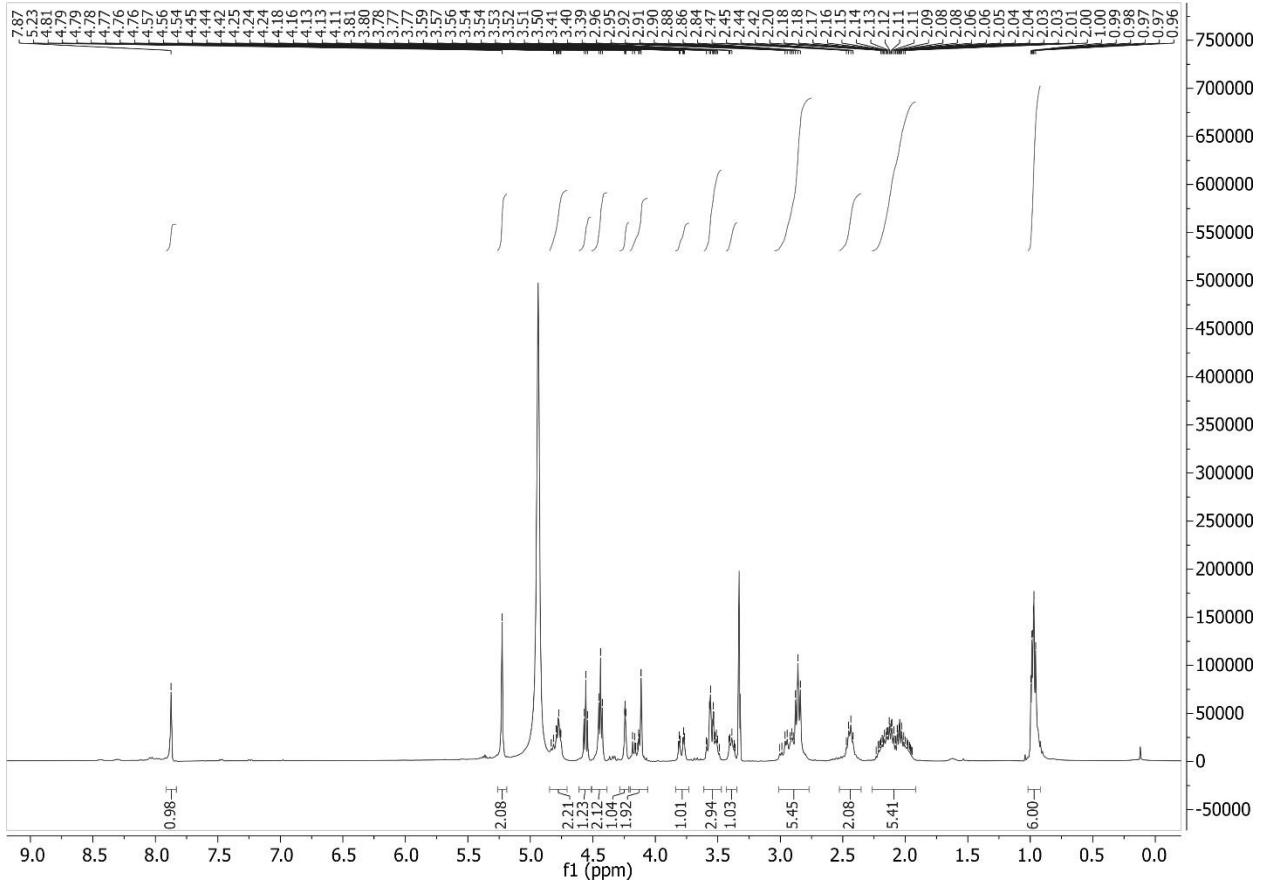

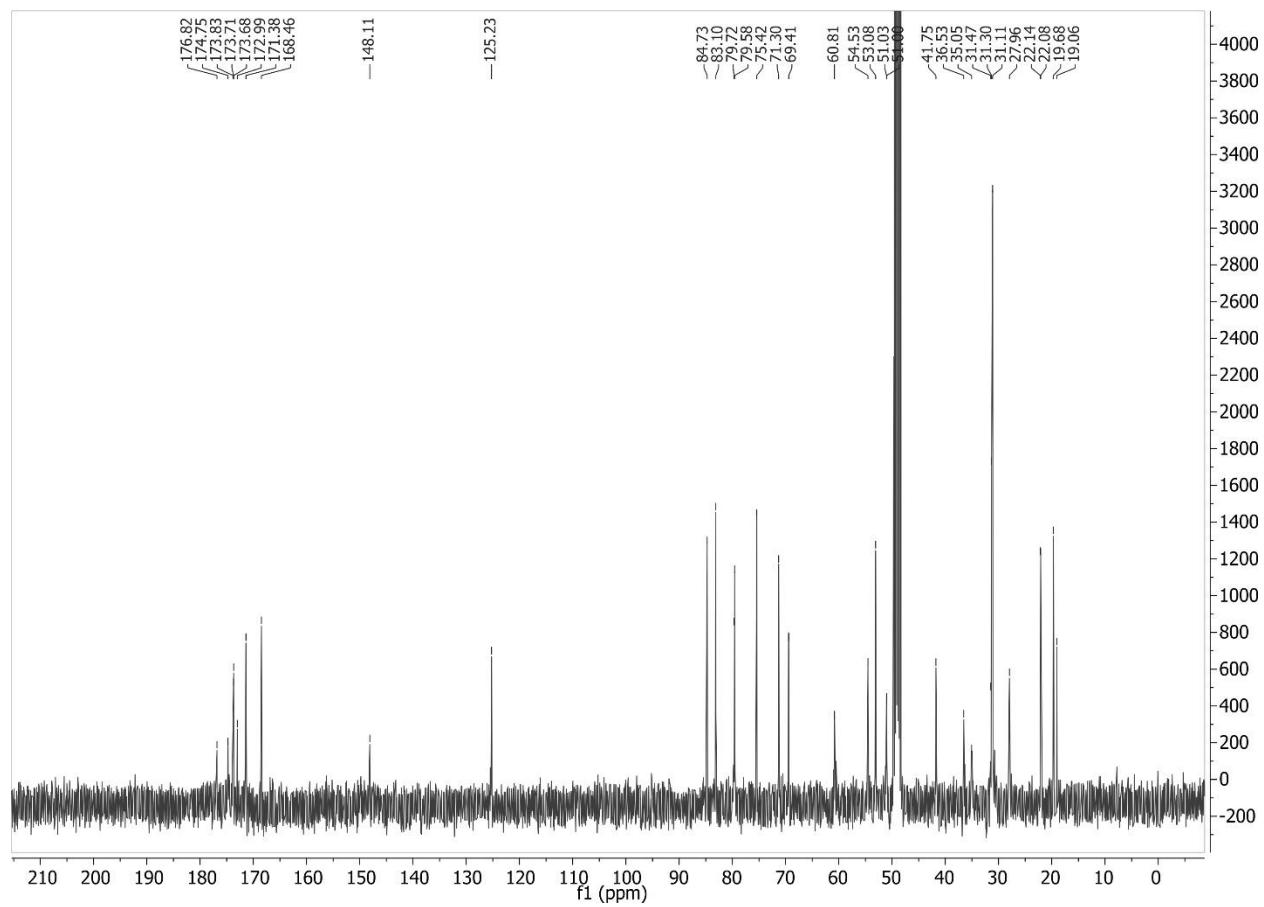





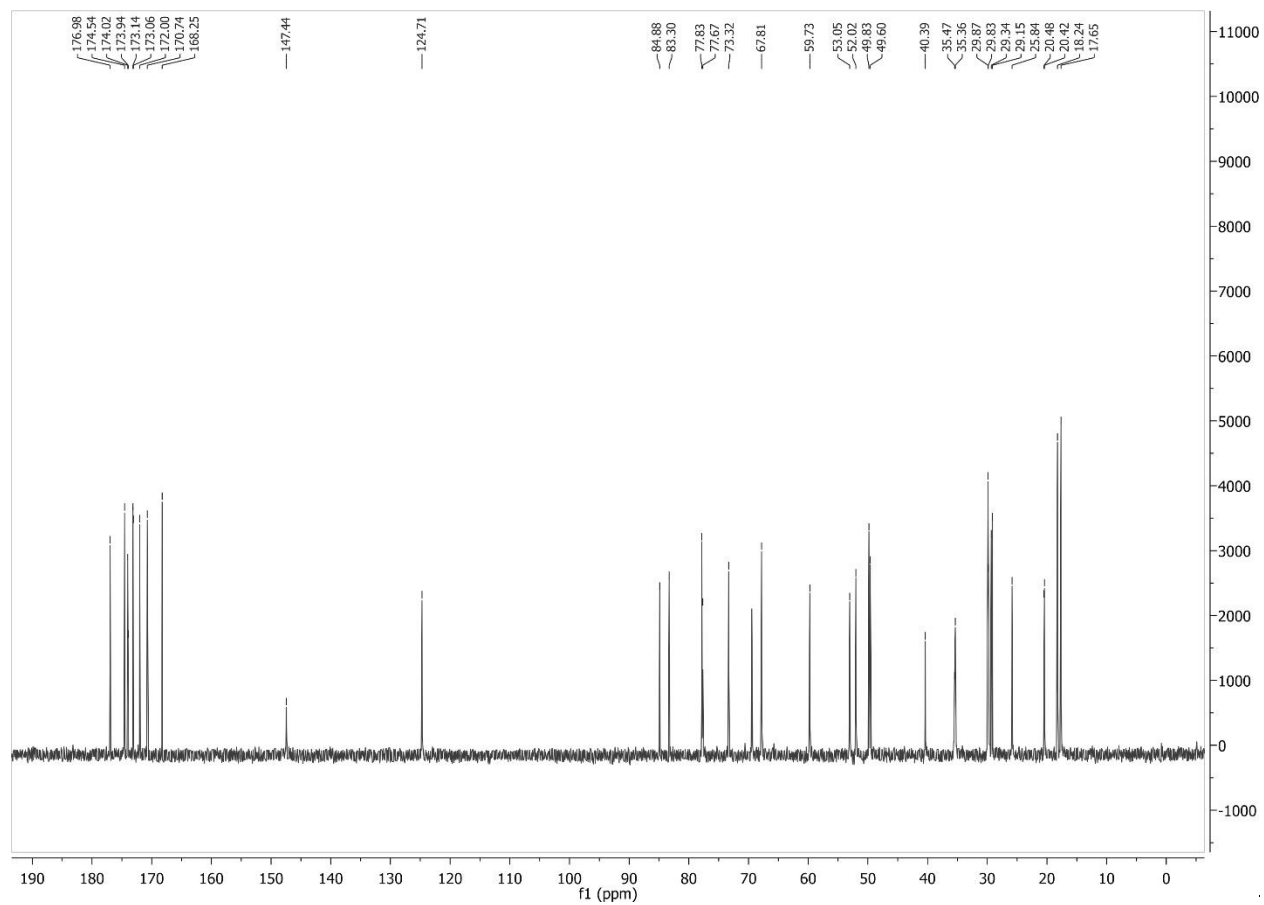



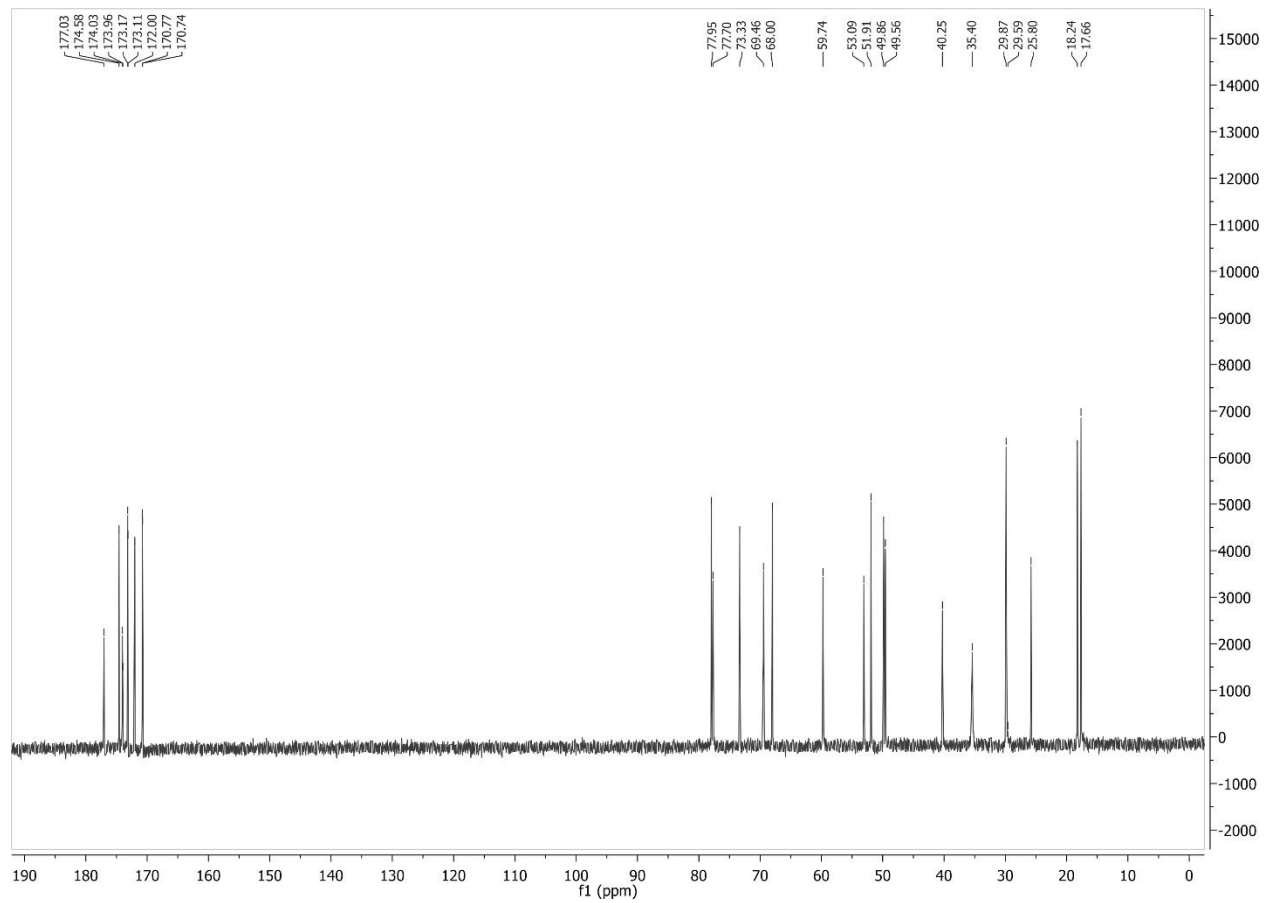

**Compound 20b** (in CD<sub>3</sub>OD, standardized to 3.31 signal)

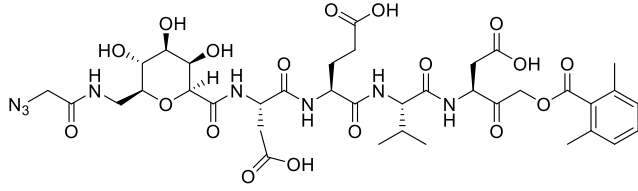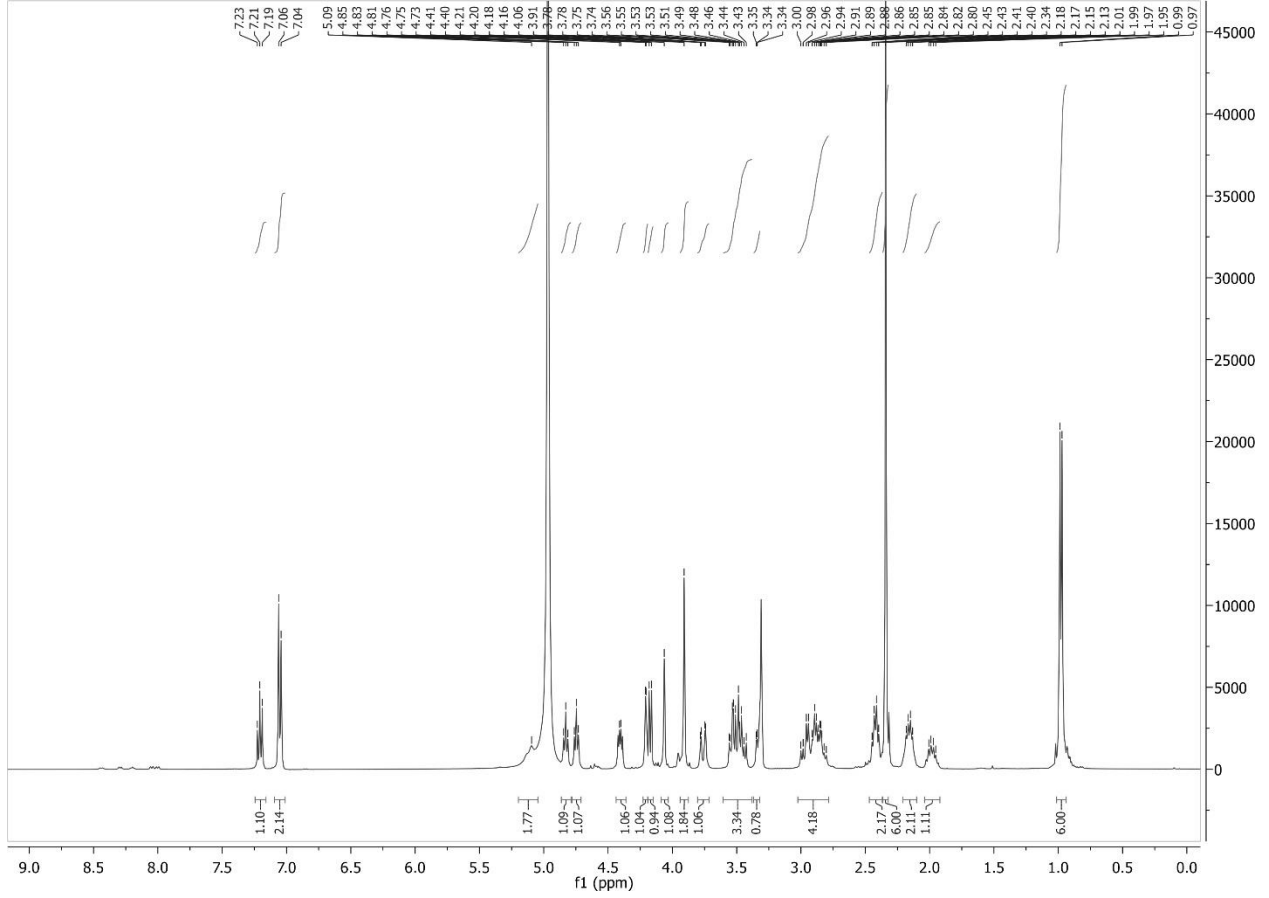

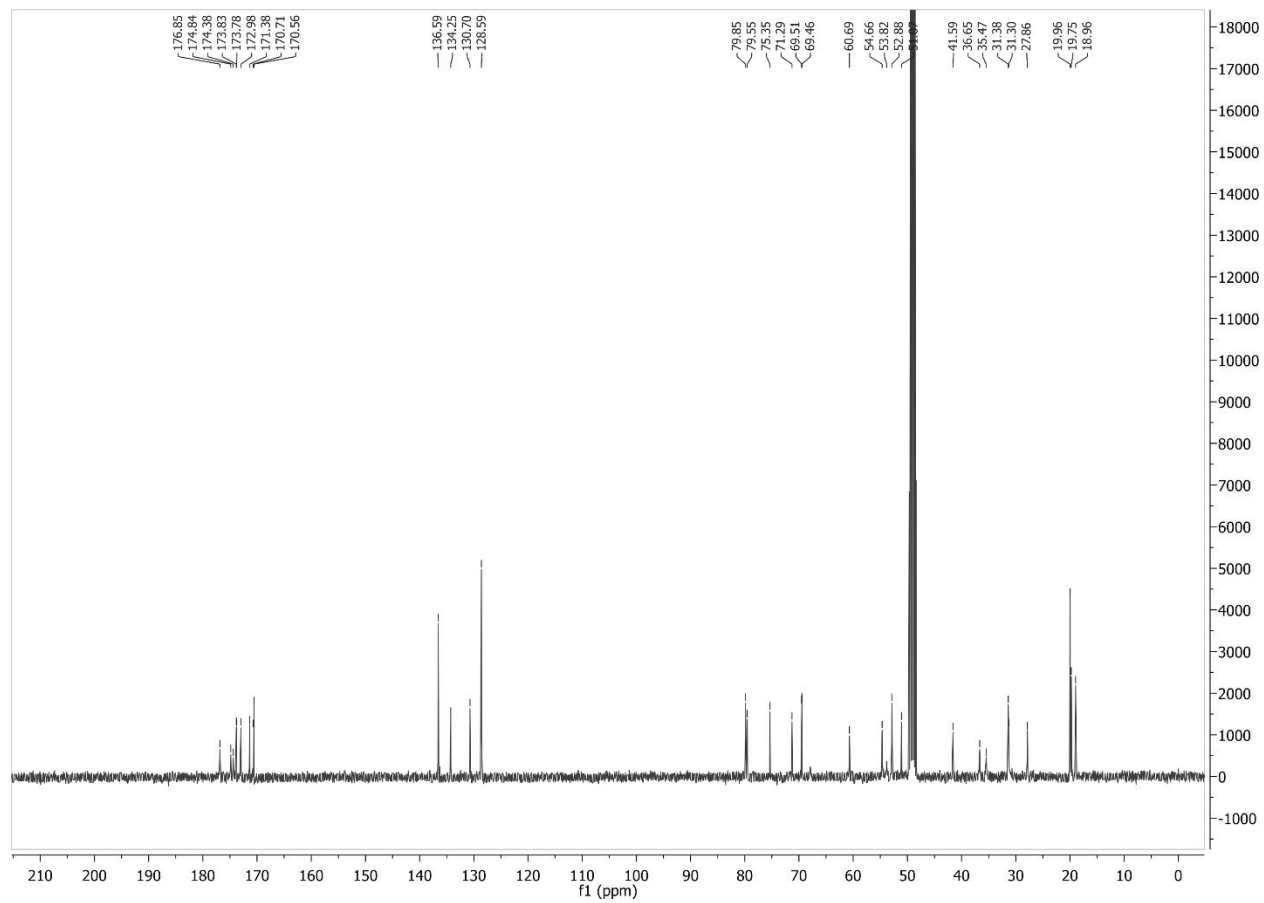

Supplement: c9ob00657e1.pdf [file c9ob00657e1.pdf]
